# Supplementary material for: Marine guanidine alkaloids crambescidins inhibit tumor growth and activate intrinsic apoptotic signaling inducing tumor regression in a colorectal carcinoma zebrafish xenograft model
Source: PubMed Central journal article supplement (PMC5347754; doi:10.18632/oncotarget.13068), 2016-11-04
Supplement: oncotarget-07-83071-s001.pdf [file oncotarget-07-83071-s001.pdf]

## Marine guanidine alkaloids crambescidins inhibit tumor growth and activate intrinsic apoptotic signaling inducing tumor regression in a colorectal carcinoma zebrafish xenograft model

### SUPPLEMENTARY FIGURES

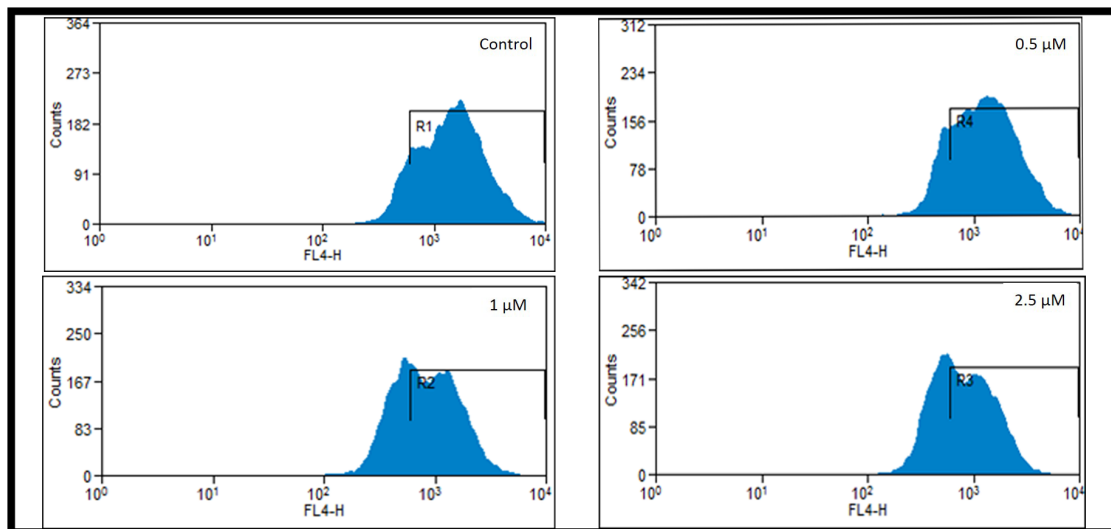

Supplementary Figure S1: Quantification of mitochondrial viability of control and 0.5 μM, 1 μM, and 2.5 μM C816-treated cells after 24 h as determined by flow cytometry analysis of Mitotracker<sup>®</sup> Deep Red-stained cells.

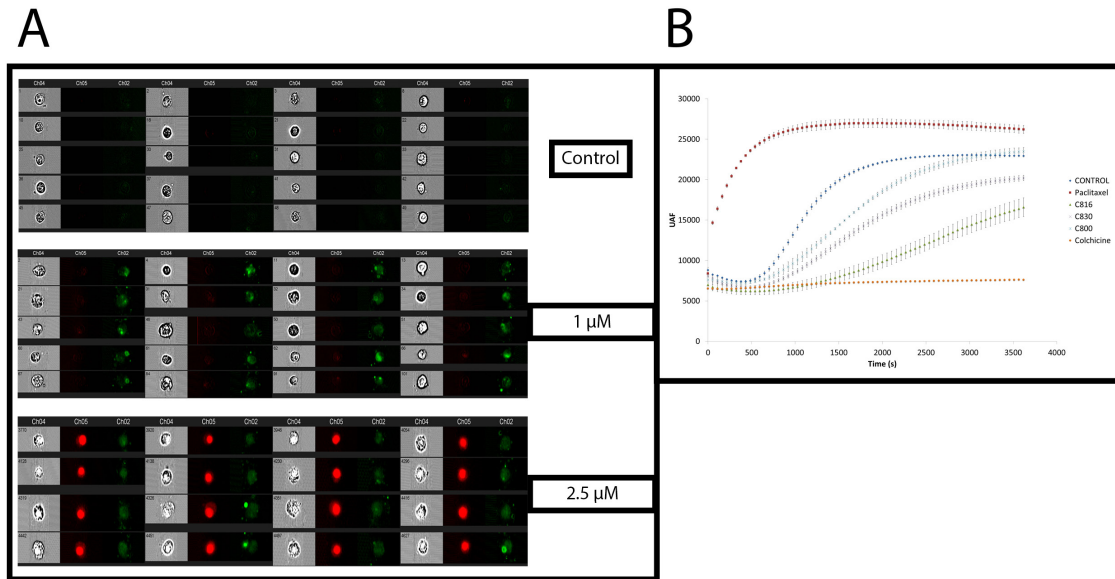

**Supplementary Figure S2: A.** Representative images of control and C816-treated cells (24h) as obtained by flow cytometry analysis using an ImageStream cytometer and Annexin V/IP. **B.** Tubulin polymerization was assayed in the presence of 10  $\mu$ M paclitaxel (tubulin polymerization enhancer), 30  $\mu$ M colchicine (tubulin polymerization inhibitor), 2.5  $\mu$ M C800, 2.5  $\mu$ M C830, 1  $\mu$ M C816, or vehicle. Polymerization was determined spectrofluorimetrically during 1 h, with a measurement performed every 54 s. AUF: arbitrary fluorescence units.
